# Supplementary material
Source: MDPI journal article supplement (https://www.mdpi.com/2073-4433/14/9/1443)
Supplement: s1 [file s1 › atmosphere-2579301-supplementary.pdf]

# Dynamic and Thermodynamic Drivers of Severe Sub-Hourly Precipitation Events in Mainland Portugal

José Cruz <sup>1,2,\*</sup>, Margarida Belo-Pereira <sup>1,3</sup>, André Fonseca <sup>1,2</sup> and João A. Santos <sup>1,2</sup>

<sup>1</sup> Centre for the Research and Technology of Agro-environmental and Biological Sciences, CITAB, Universidade de Trás-os-Montes e Alto Douro, UTAD, 5000-801 Vila Real, Portugal; andre.fonseca@utad.pt (A.F.); jsantos@utad.pt (J.A.S.)

<sup>2</sup> Institute for Innovation, Capacity Building, and Sustainability of Agri-Food Production (Inov4Agro), 5000-801 Vila Real, Portugal

<sup>3</sup> Instituto Português do Mar e da Atmosfera, Divisão de Meteorologia Aeronáutica, Rua C do Aeroporto, 1749-077 Lisboa, Portugal; margarida.belo@ipma.pt

\* Correspondence: josecruz@utad.pt

## Supplemental Material

**Tabela S1.** List of the selected 34 weather stations (WS) in mainland Portugal. Their codes and names are shown. The corresponding percentages of missing values on the daily timescale precipitation over the recording period are also provided.

| Code       | Weather station name    | Nb. of days with data | Missing data (%) |
|------------|-------------------------|-----------------------|------------------|
| 541        | Sines Monte             | 8185                  | 3                |
| 604        | Geres Carris            | 7399                  | 12               |
| 566        | Vila Real               | 8388                  | 0                |
| 545        | Porto Pedras Rubras     | 7781                  | 7                |
| 707        | Coimbra                 | 8363                  | 0                |
| 568        | Penhas Douradas         | 7979                  | 5                |
| 557        | Évora                   | 8384                  | 0                |
| 579        | Lisboa Gago Coutinho    | 7971                  | 5                |
| 535        | Lisboa Geofísico        | 7810                  | 7                |
| <b>551</b> | <b>Viana do Castelo</b> | <b>8134</b>           | <b>3</b>         |
| <b>554</b> | <b>Faro Aeroporto</b>   | <b>7488</b>           | <b>11</b>        |
| 560        | Viseu CC                | 8177                  | 3                |
| 562        | Beja                    | 7805                  | 7                |
| <b>570</b> | <b>Castelo Branco</b>   | <b>7840</b>           | <b>7</b>         |
| 571        | Portalegre              | 8007                  | 5                |
| 575        | Bragança                | 7632                  | 9                |
| 577        | Odemira S. Teotónio     | 6805                  | 19               |
| 611        | Montalegre              | 6921                  | 18               |
| 616        | Chaves Aeródromo        | 7472                  | 11               |
| 619        | Cabril                  | 7180                  | 15               |
| 632        | Mirandela               | 6947                  | 17               |
| 635        | Miranda do Douro        | 6803                  | 19               |
| 637        | Mogadouro               | 7087                  | 16               |
| 683        | Guarda                  | 7159                  | 15               |
| 685        | Nelas                   | 7342                  | 13               |
| 697        | Lousã Aeródromo         | 7184                  | 14               |
| 705        | Anadia                  | 7044                  | 16               |
| 803        | Zebreira                | 7072                  | 16               |
| 812        | Alvega                  | 7213                  | 14               |
| 824        | Avis Benavila           | 7013                  | 17               |
| 835        | Elvas                   | 7715                  | 8                |
| 837        | Estremoz                | 6775                  | 19               |
| 867        | Castro Marim            | 6785                  | 19               |
| 878        | Portimão Aeródromo      | 7294                  | 13               |

**Tabela S2.** Number and percentage of events recorded in each station and by precipitation class.

| Weather Station       | Composites | Nb. of Events | Pct. of Events |
|-----------------------|------------|---------------|----------------|
| Viana do Castelo (VC) | C0         | 6248          | 65.4           |
|                       | C1         | 2035          | 21.3           |
|                       | C2         | 1215          | 12.7           |
|                       | C3         | 60            | 0.6            |
| Castelo Branco (CB)   | C0         | 6153          | 72.8           |
|                       | C1         | 1391          | 16.5           |
|                       | C2         | 853           | 10.1           |
|                       | C3         | 51            | 0.6            |
| Faro (F)              | C0         | 5747          | 76.2           |
|                       | C1         | 1063          | 14.1           |
|                       | C2         | 659           | 8.7            |
|                       | C3         | 75            | 1.0            |

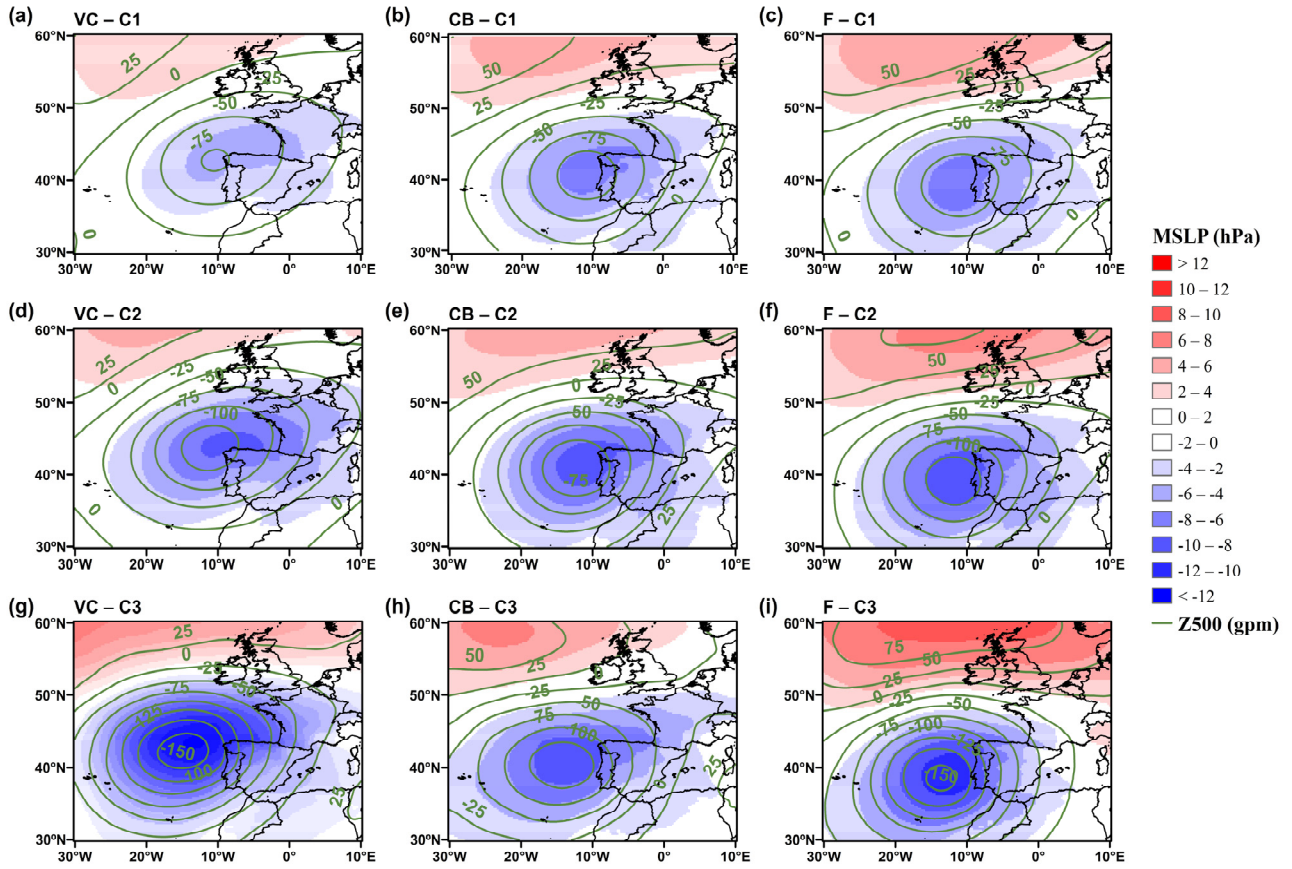

**Figure S1.** Composites of hourly anomalies of MSLP (in hPa) (shading) and Z500 (in gpm) (contours lines represented in green, with a spacing of 25 gpm) for (a,b,c) C1, (d,e,f) C2, and (g,h,i) C3.

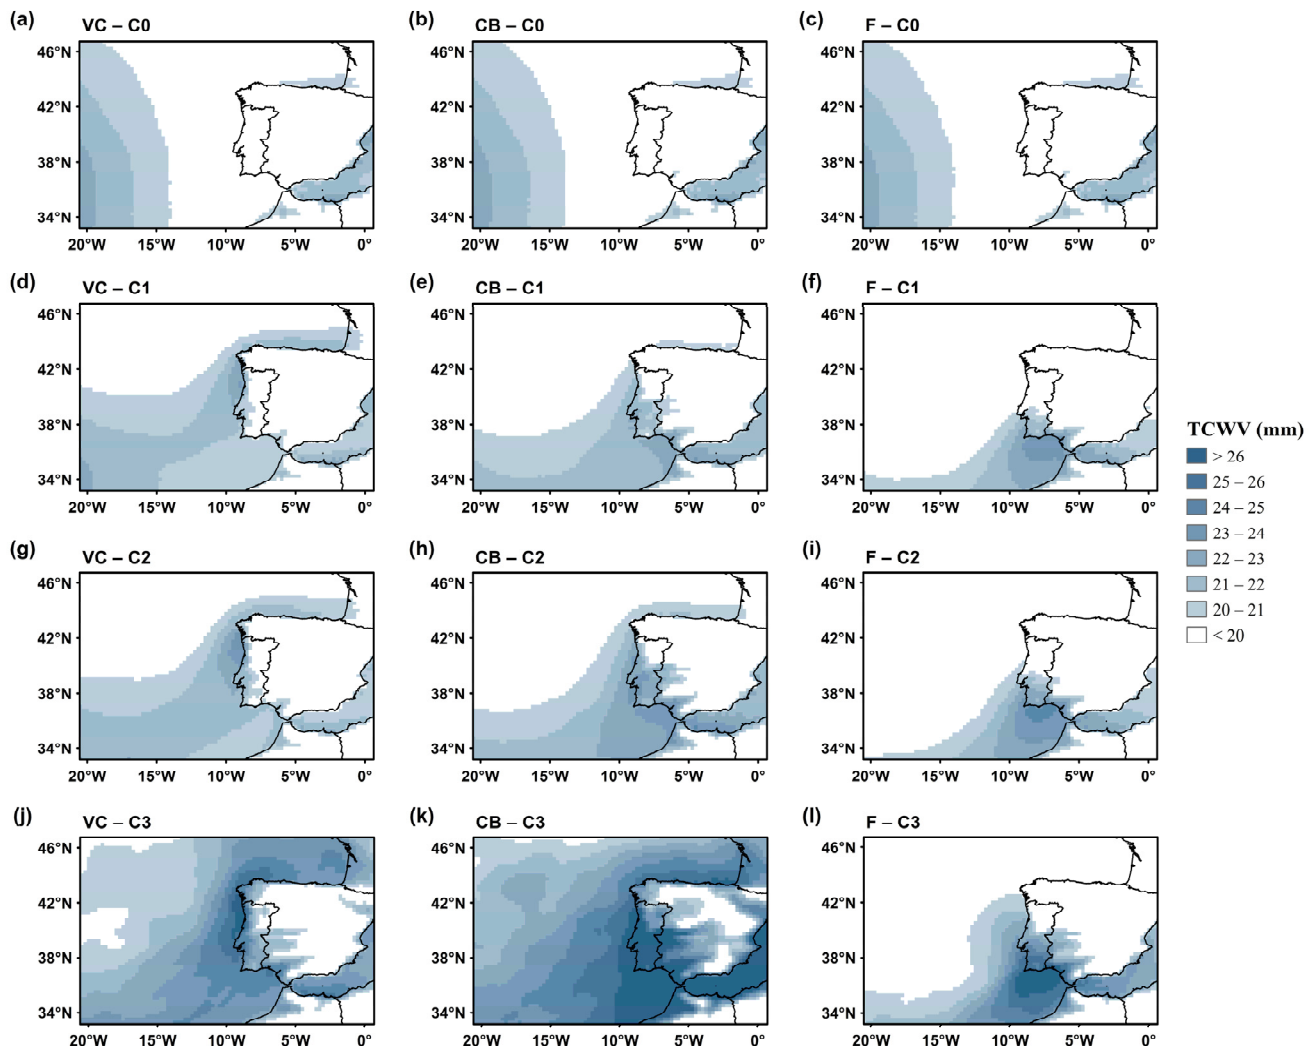

**Figure S2.** Hourly composites of total column water vapour (TCWV, shading in mm) for precipitation classes (a,b,c) C0, (d,e,f) C1, (g,h,i) C2, and (j,k,l) C3 in each WS (VC, CB, and F).

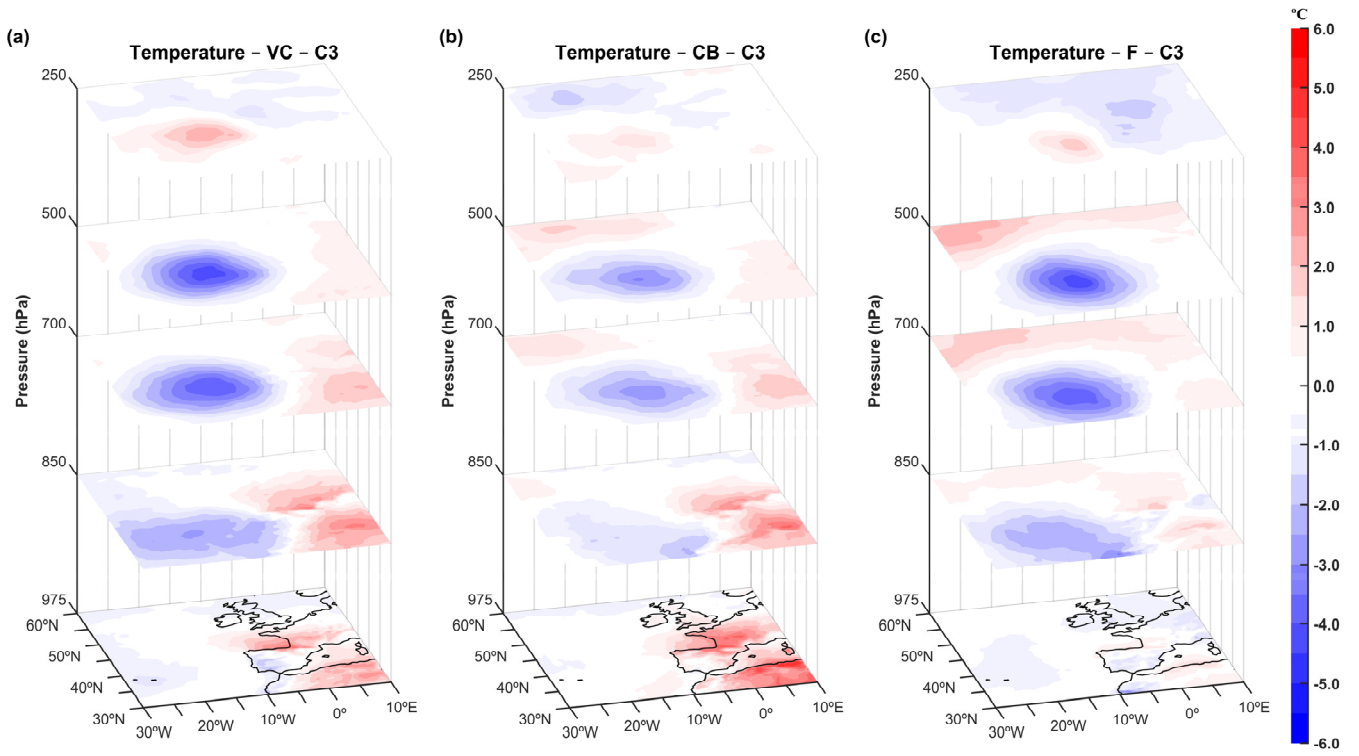

**Figure S3.** Composites of hourly anomalies of temperature anomaly (in °C) for precipitation class C3 (SHHP events), at different vertical levels, and for (a) VC, (b) CB, and (c) F.

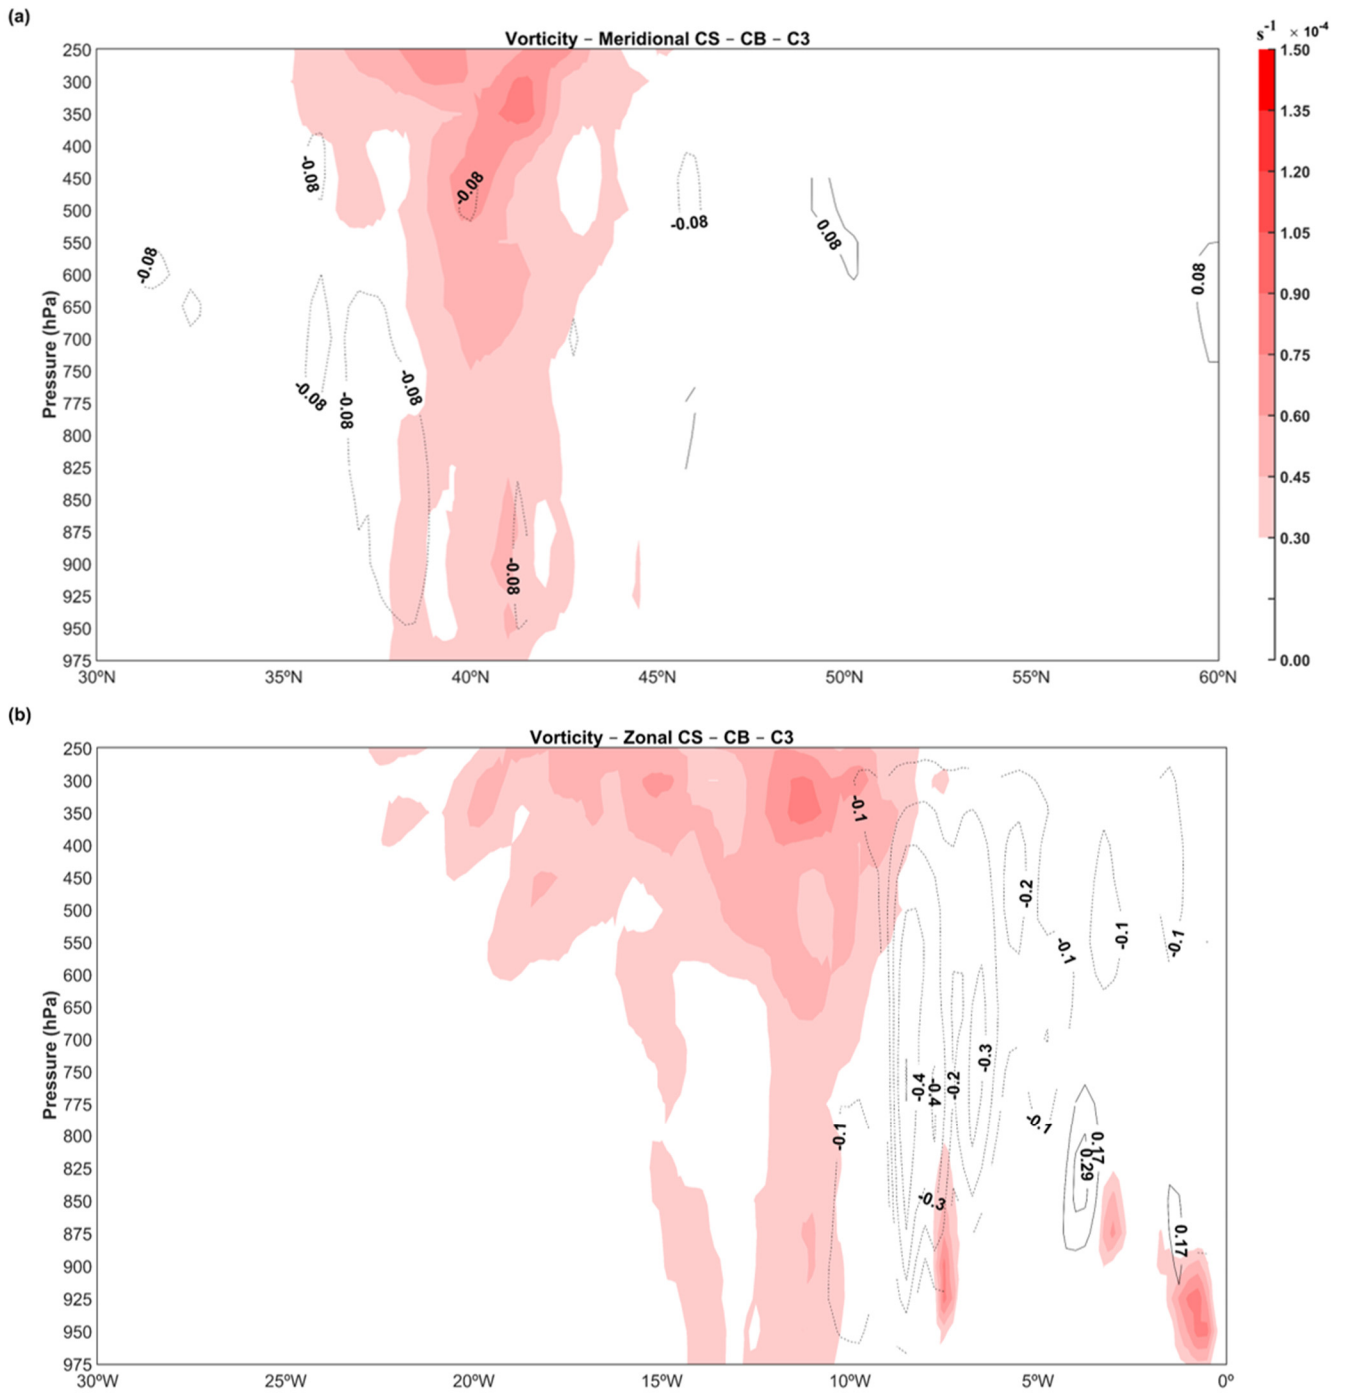

**Figure S4.** (a) Meridional and (b) zonal cross-sections of relative vorticity composites of hourly anomalies (shading in  $\text{s}^{-1}$ ) and omega-vertical velocity (contours in  $\text{Pa s}^{-1}$ , positive/negative values in solid/dashed lines) for class C3 and CB.

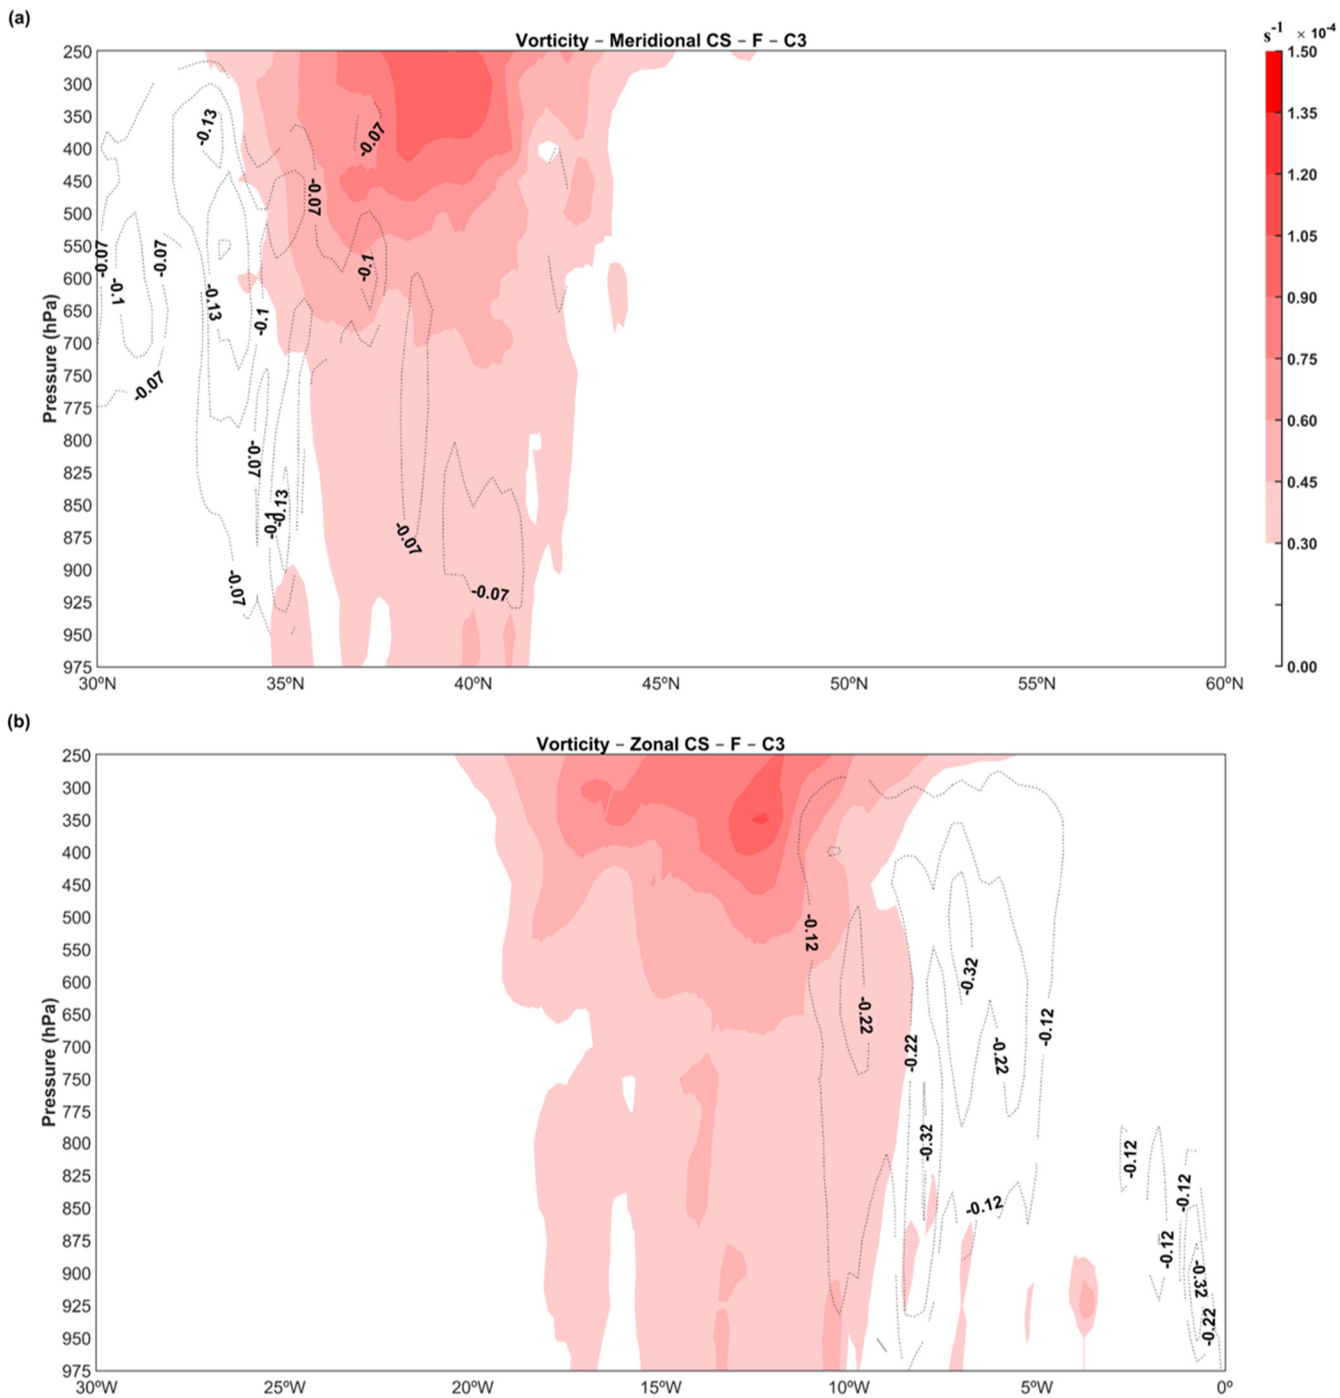

**Figure S5.** (a) Meridional and (b) zonal cross-sections of relative vorticity composites of hourly anomalies (shading in  $\text{s}^{-1}$ ) and omega-vertical velocity (contours in  $\text{Pa s}^{-1}$ , positive/negative values in solid/dashed lines) for class C3 and F.

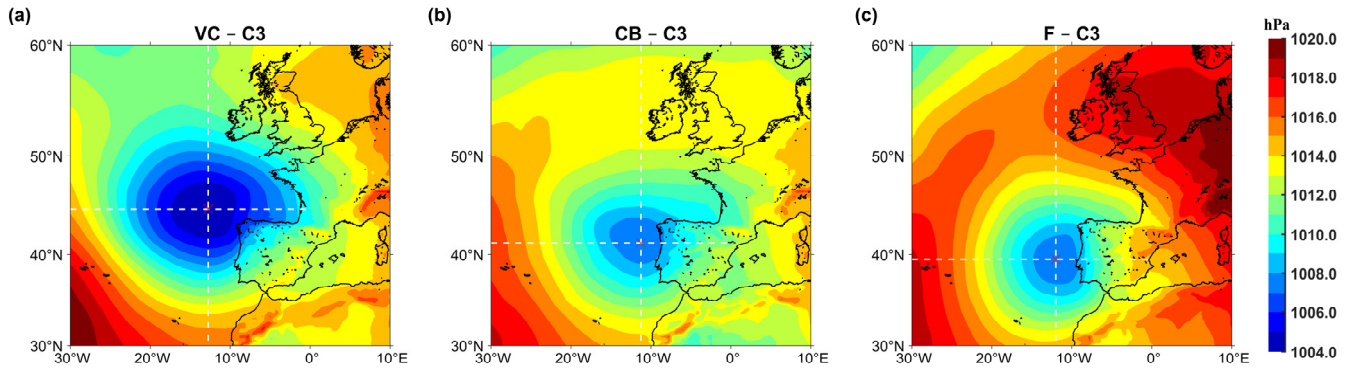

**Figure S6.** Hourly composites of MSLP (shading in hPa) and position of meridional and zonal cross-sections (white dashed lines) for precipitation class C3 (SHHP events), for (a) VC, (b) CB, and (c) F.

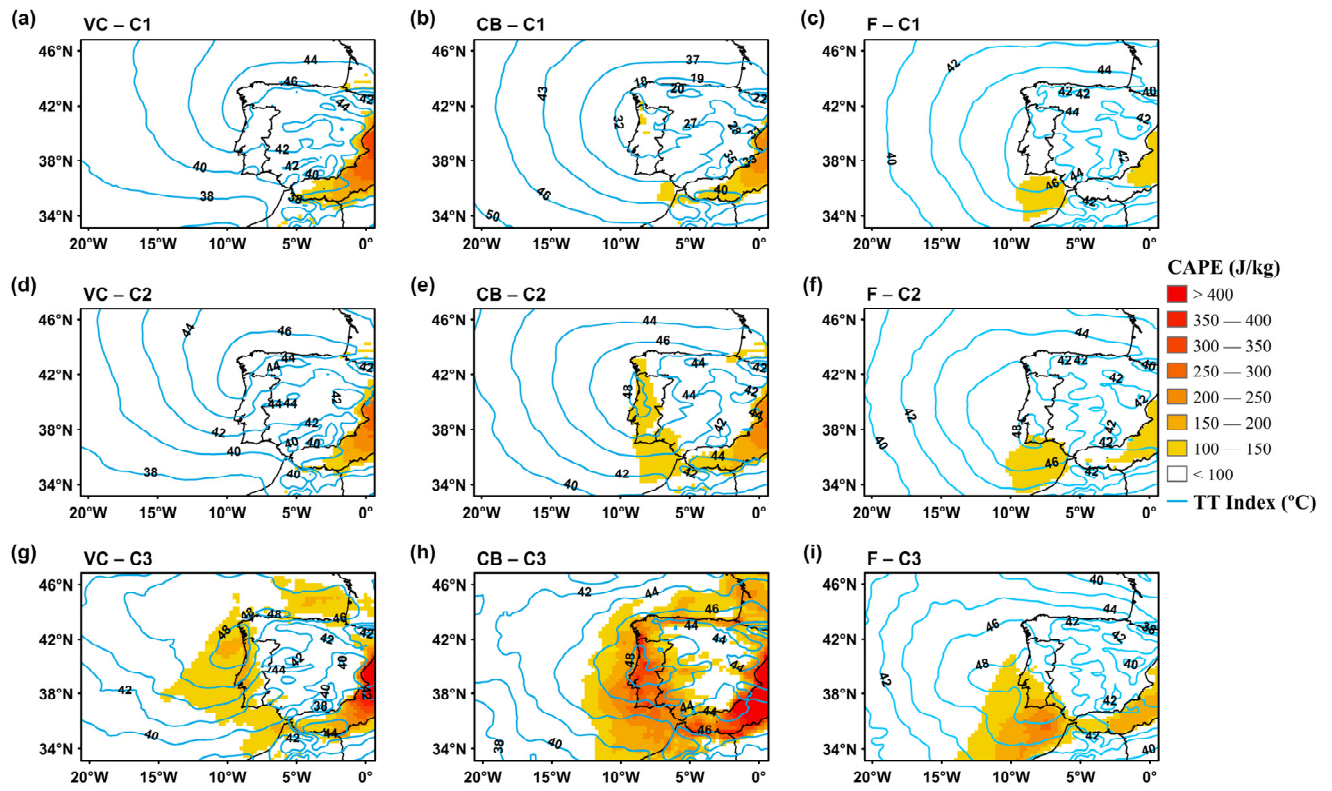

**Figure S7.** Hourly composites of CAPE (shading in  $\text{J kg}^{-1}$ ) and Total-Totals index (blue contours in  $^{\circ}\text{C}$ ,  $2^{\circ}\text{C}$  spacing), for (a,b,c) C0, (d,e,f) C1, (g,h,i) C2 (j,k,l), and C3 in each WS (VC, CB, and F).

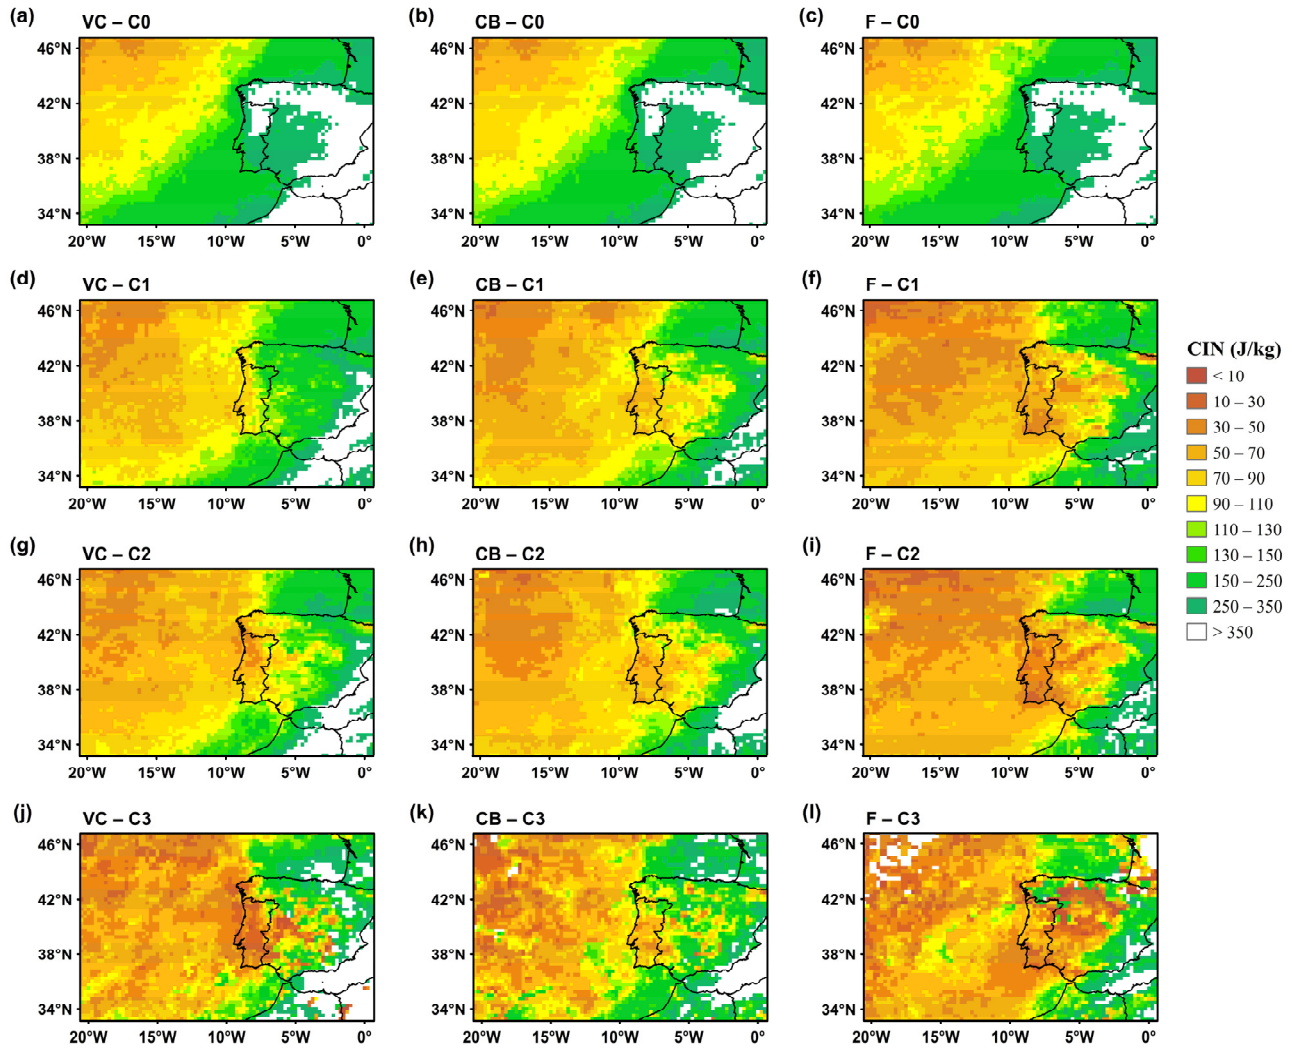

**Figure S8.** Hourly composites of convective inhibition (CIN, shading in  $\text{J kg}^{-1}$ ) for precipitation classes (a,b,c) C0, (d,e,f) C1, (g,h,i) C2, and (j,k,l) C3 in each WS (VC, CB, and F).

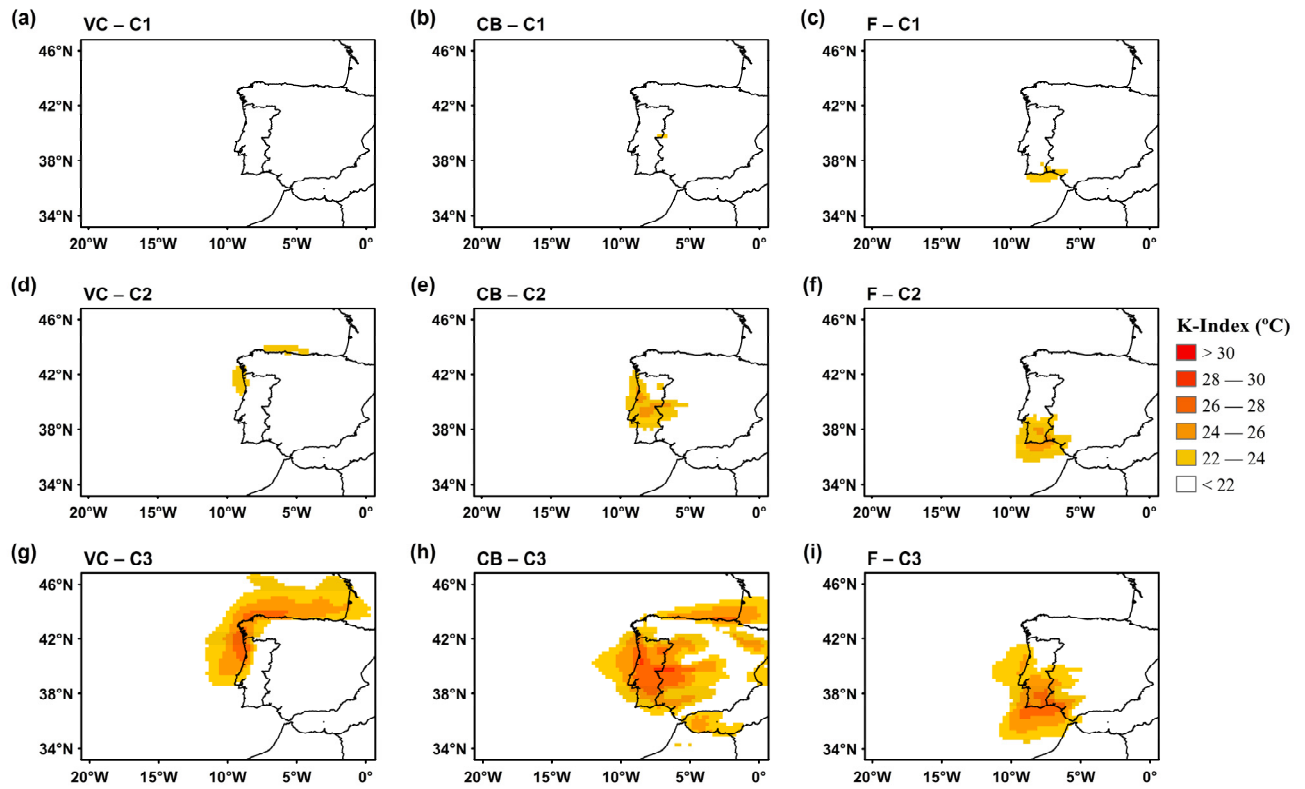

**Figure S9.** Hourly composites of K-index (shading in °C) for (a,b,c) C0, (d,e,f) C1, (g,h,i) C2 (j,k,l), and C3 in each WS (VC, CB, and F).

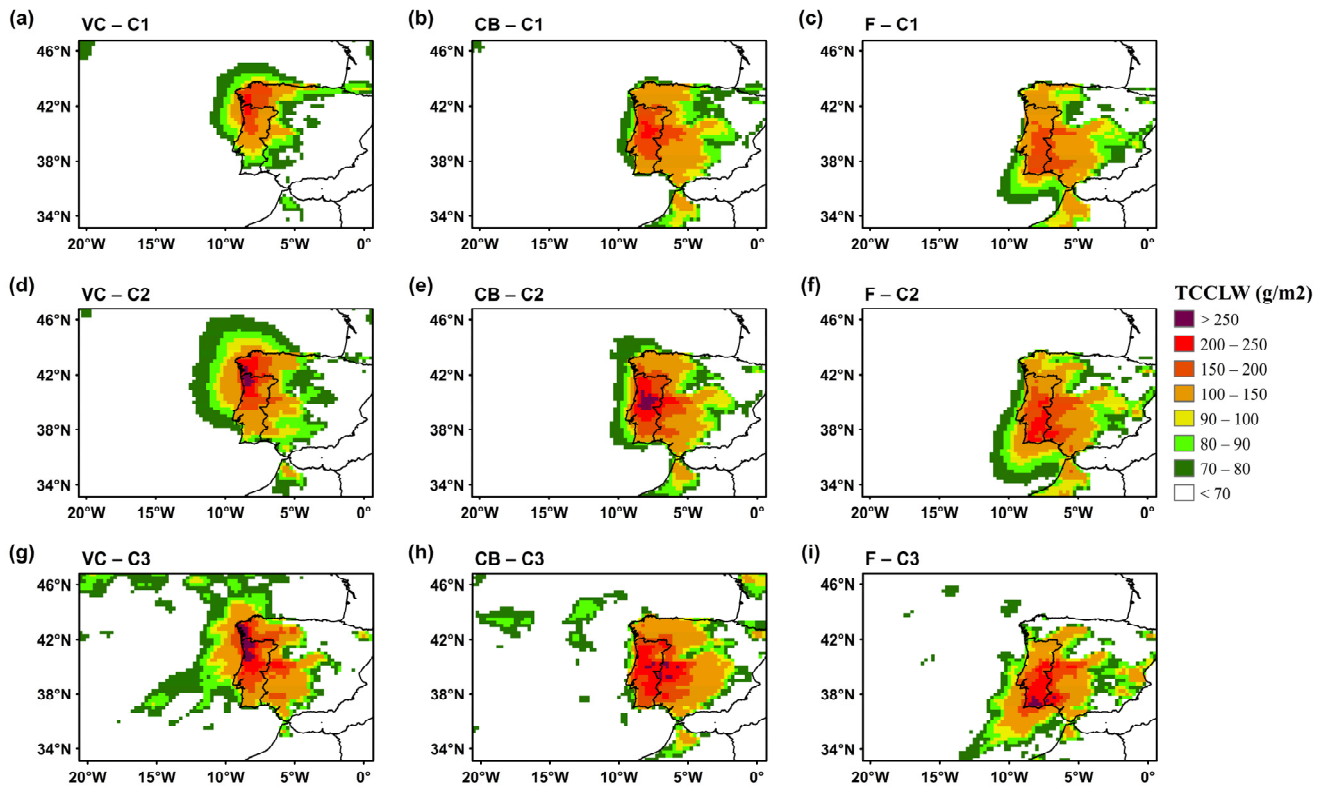

**Figure S10.** Hourly composites of total column cloud liquid water, TCCLW (shading in  $\text{g m}^{-2}$ ) for precipitation classes (a,b,c) C1, (d,e,f) C2, and (g,h,i) C3 in each WS (VC, CB, and F).

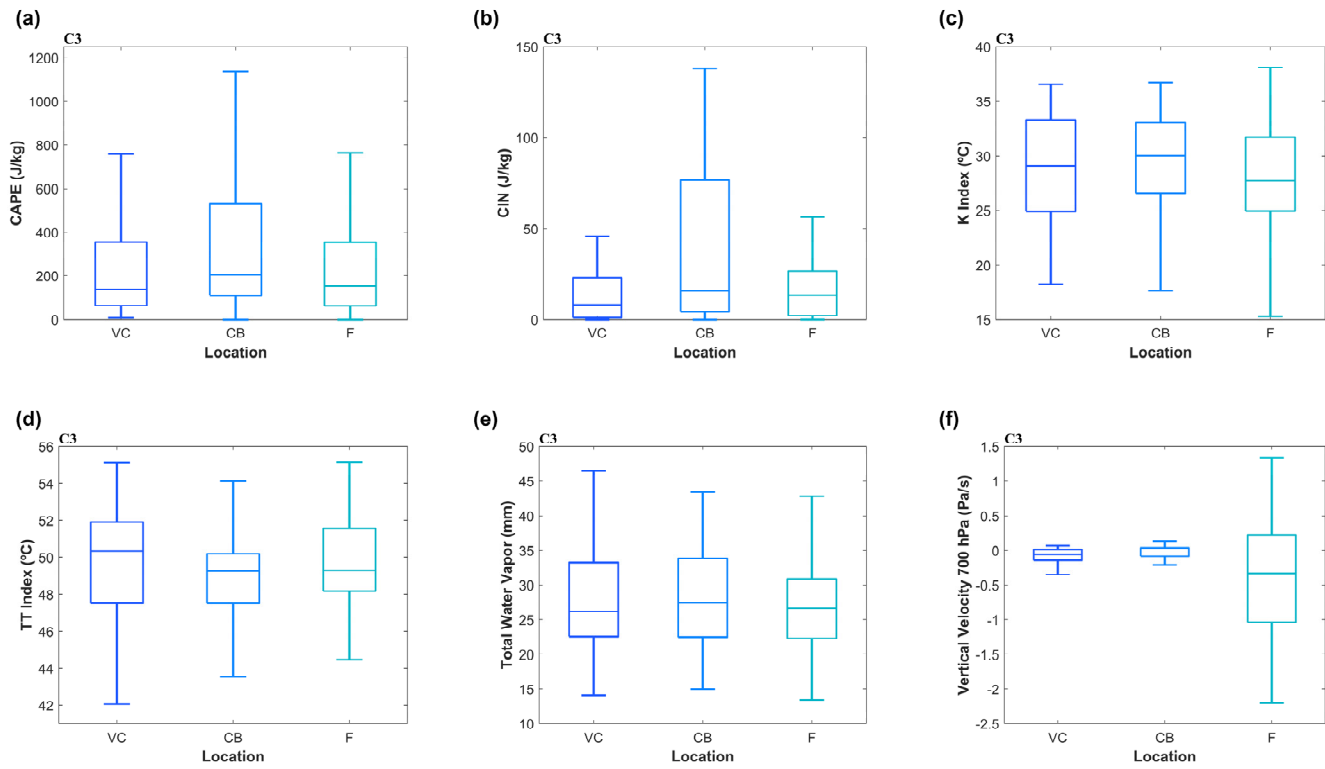

**Figure S11.** Boxplots of (a) CAPE (in  $\text{J kg}^{-1}$ ), (b) CIN (in  $\text{J kg}^{-1}$ ), (c) K-index (in  $^{\circ}\text{C}$ ), (d) TT-index (in  $^{\circ}\text{C}$ ), (e) TCWV (in mm), and (f) vertical velocity 700 hPa (in  $\text{Pa s}^{-1}$ ) for precipitation events C3 in each WS (VC, CB, and F).
